# Supplementary material
Source: PubMed Central journal article supplement (PMC4136667)
Supplement: jm5007885_si_001.pdf [file jm5007885_si_001.pdf]

Supporting Information to accompany:

# Constrained Bithiazoles: Small Molecule Correctors of Defective $\Delta F508$ -CFTR Protein Trafficking

*Keith C. Coffman<sup>†</sup>, Huy H. Nguyen<sup>†</sup>, Puay-Wah Phuan<sup>‡</sup>, Brandi M. Hudson<sup>†</sup>, Gui J. Yu<sup>†</sup>, Alex L. Bagdasarian<sup>†</sup>, Deanna Montgomery<sup>†</sup>, Michael W. Lodewyk<sup>†</sup>, Baoxue Yang<sup>‡</sup>, Choong L. Yoo<sup>†</sup>, A. S. Verkman<sup>‡</sup>, Dean J. Tantillo<sup>†</sup>, Mark J. Kurth<sup>†\*</sup>*

<sup>†</sup>*Department of Chemistry, University of California, One Shields Ave. Davis, CA, 95616*

<sup>‡</sup>*Department of Medicine & Physiology, University of California, San Francisco, CA, 94143*

CORRESPONDING AUTHOR CONTACT: Telephone: (530) 554-2145. FAX: (530) 752-8995.  
Email: mjkurth@ucdavis.edu.

## Table of Contents

|                                                                       |   |
|-----------------------------------------------------------------------|---|
| <sup>1</sup> H and <sup>13</sup> C NMR for 9a, 9e, 10a, and 10c ..... | 2 |
| Corrector Activity Figure For corr4a, 9a, 9e, 10a, and 10c .....      | 6 |
| HRMS Data Summary .....                                               | 6 |
| Computational Supporting Information .....                            | 7 |
| Gaussian09 Full Reference:.....                                       | 7 |
| Spartan10 Full Reference: .....                                       | 7 |
| Spartan conformational searching: .....                               | 7 |
| Calculated coordinates and energies for 3, 9a, and 10a: .....         | 8 |

# $^1\text{H}$ and $^{13}\text{C}$ NMR for 9a, 9e, 10a, and 10c

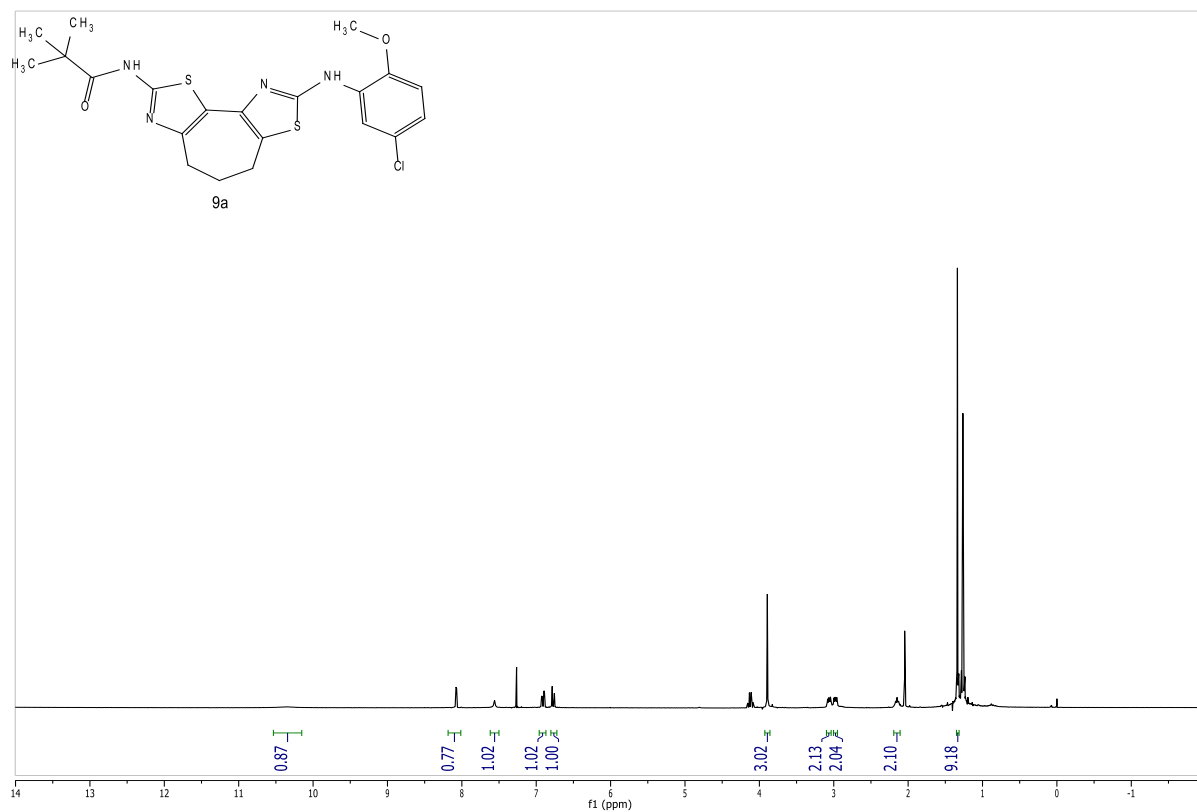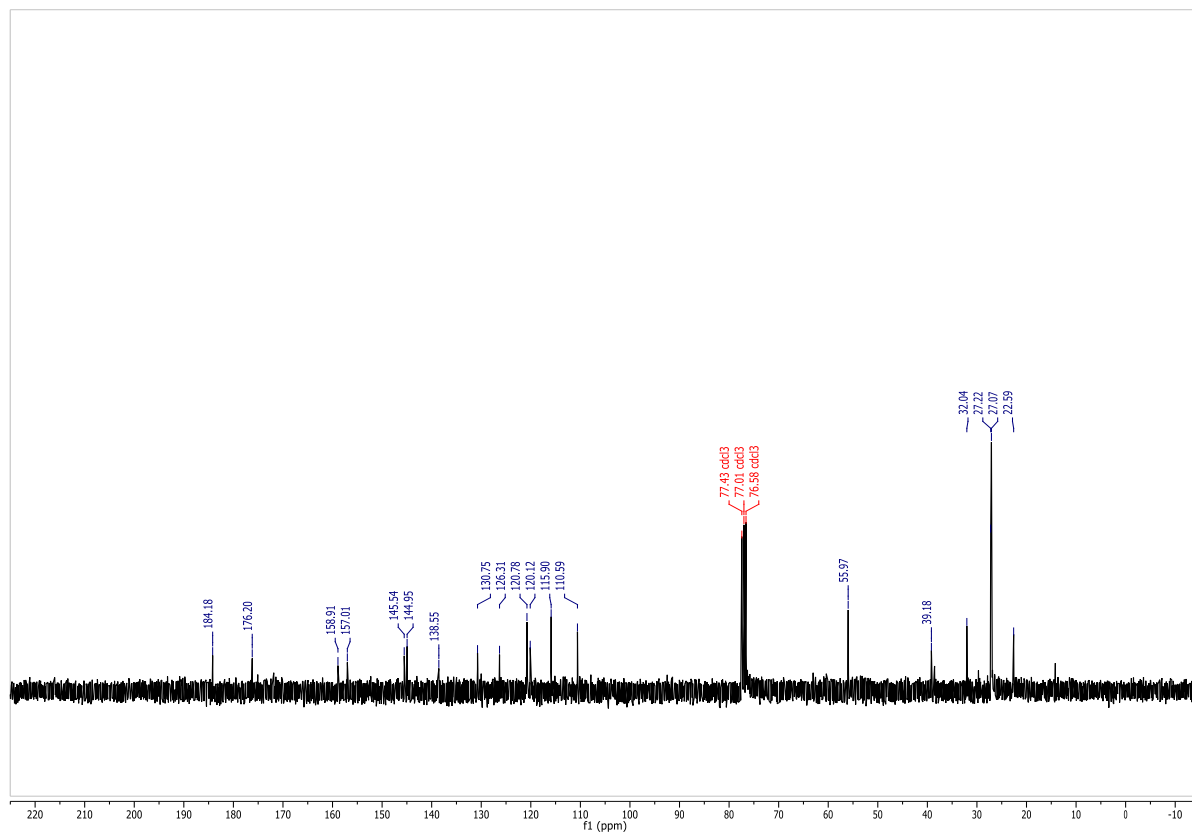

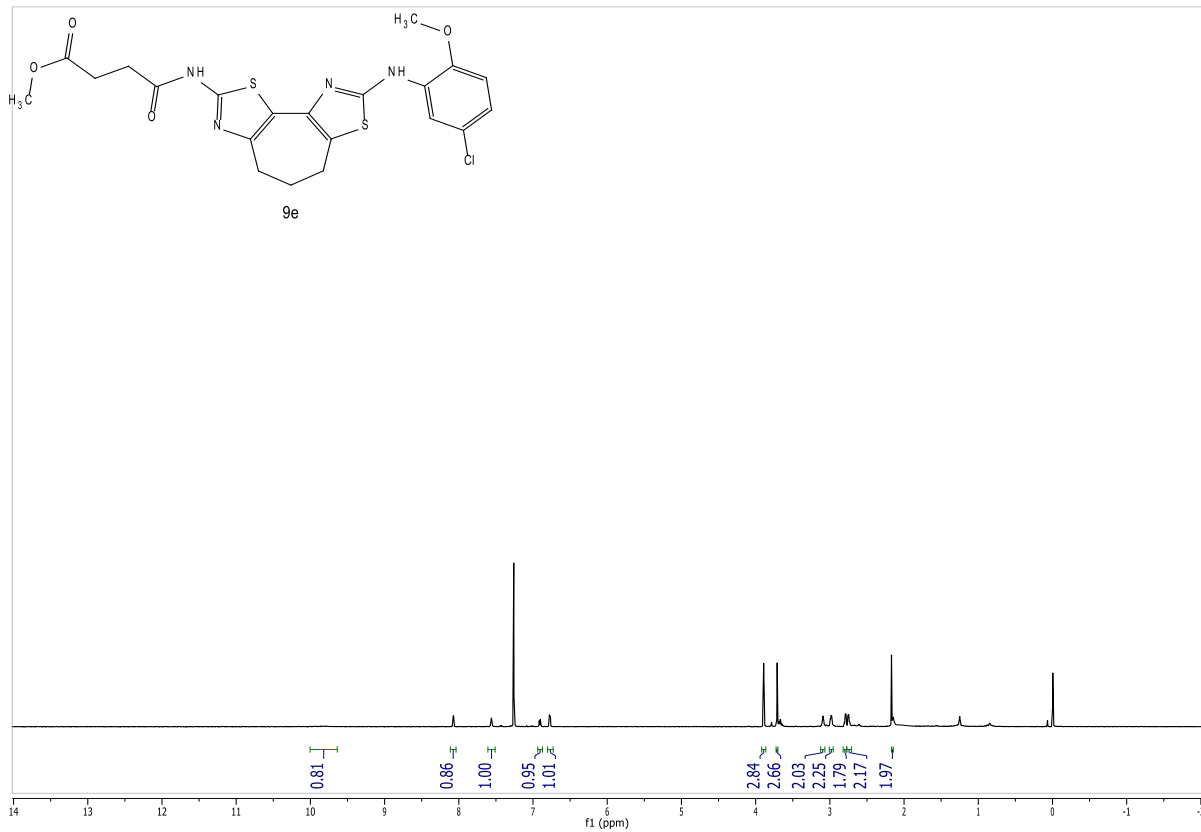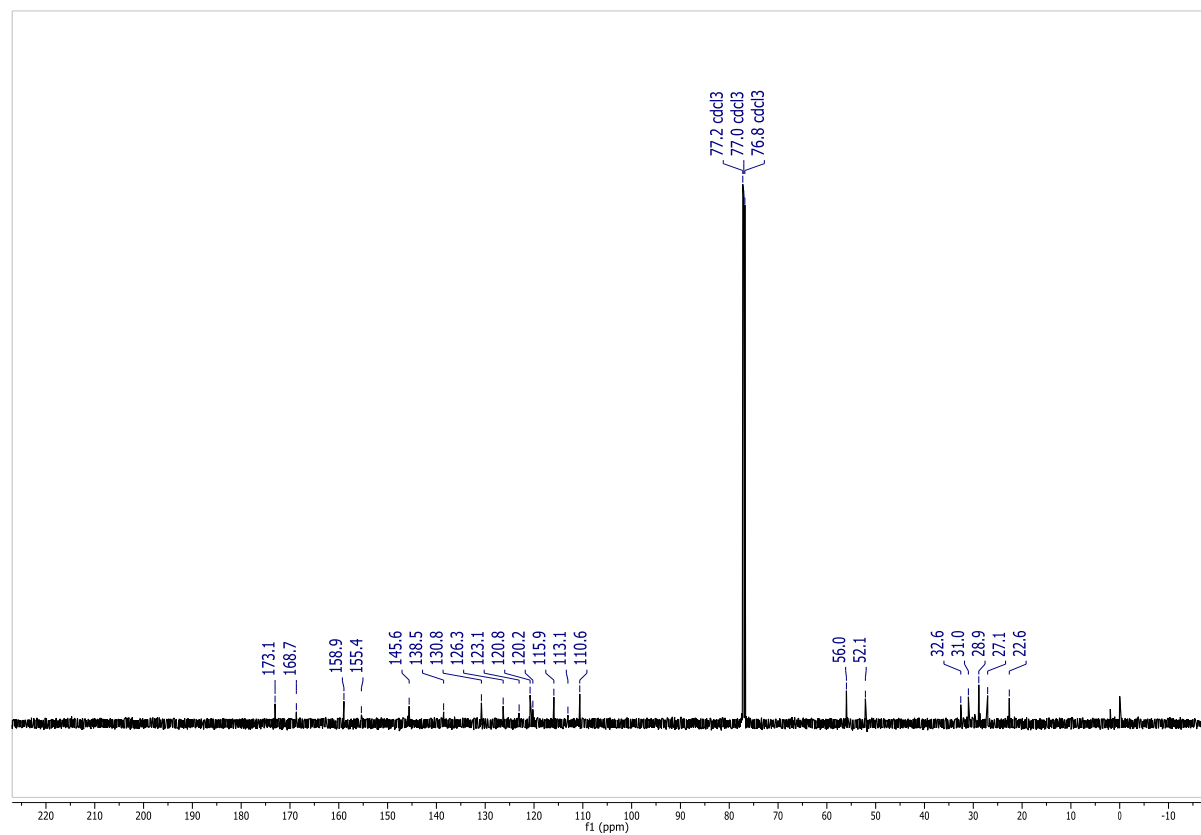

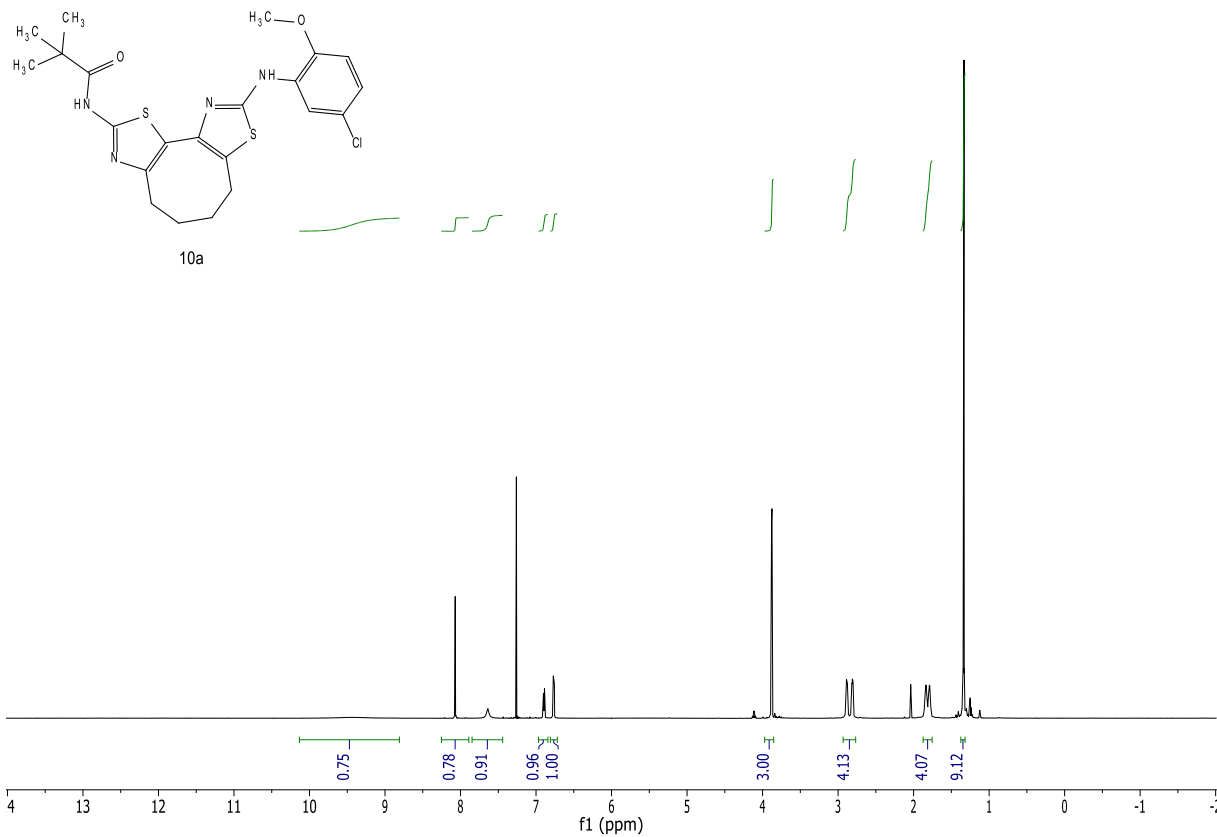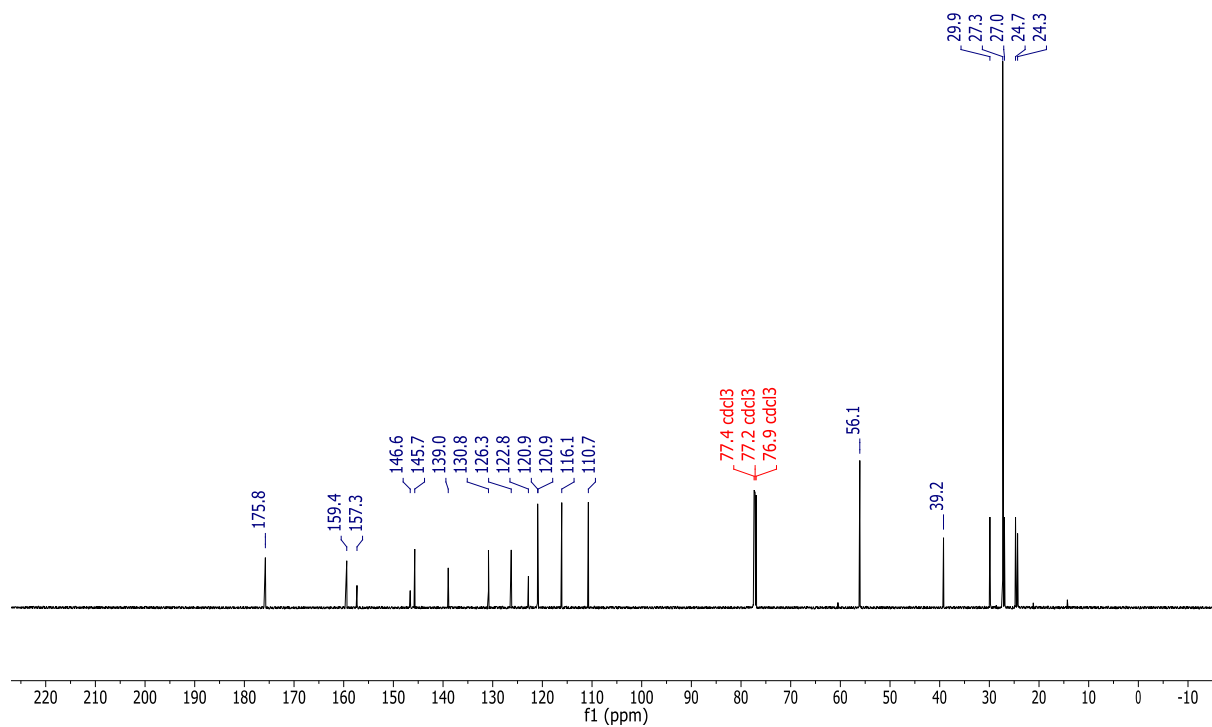

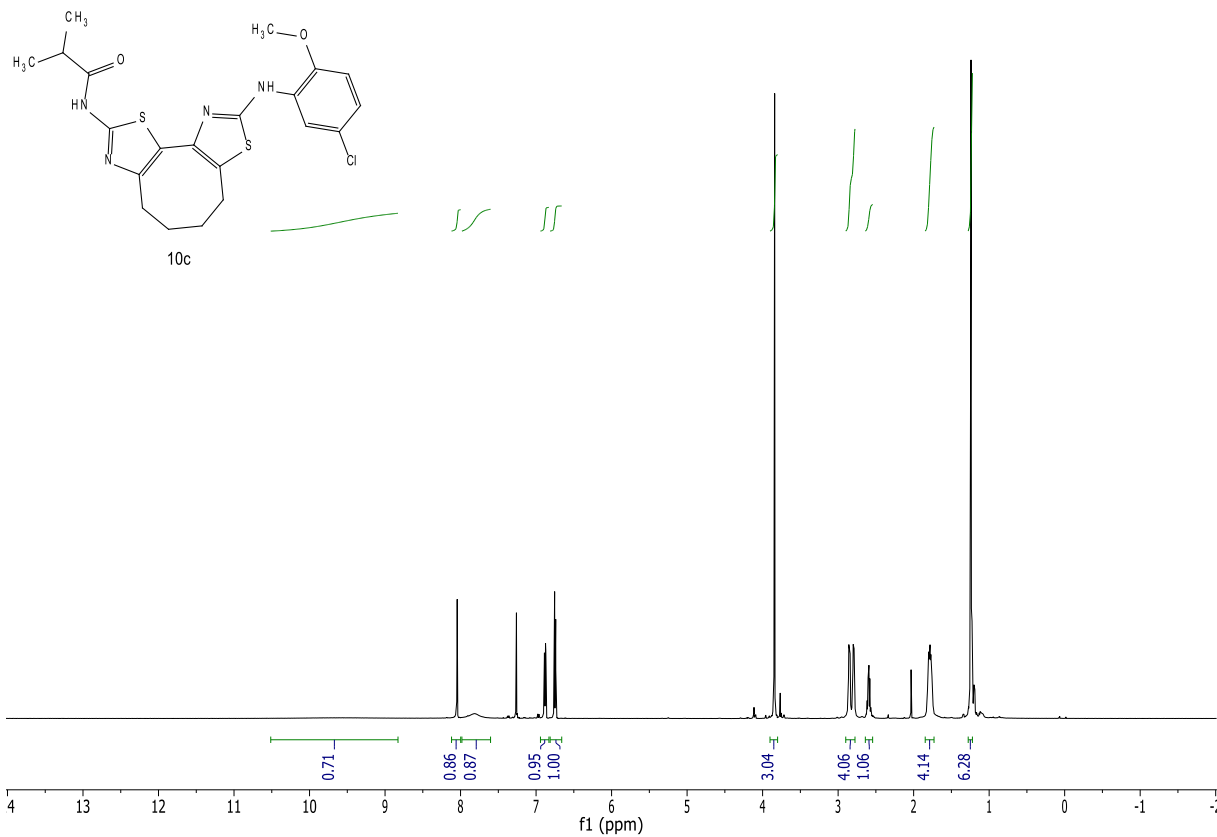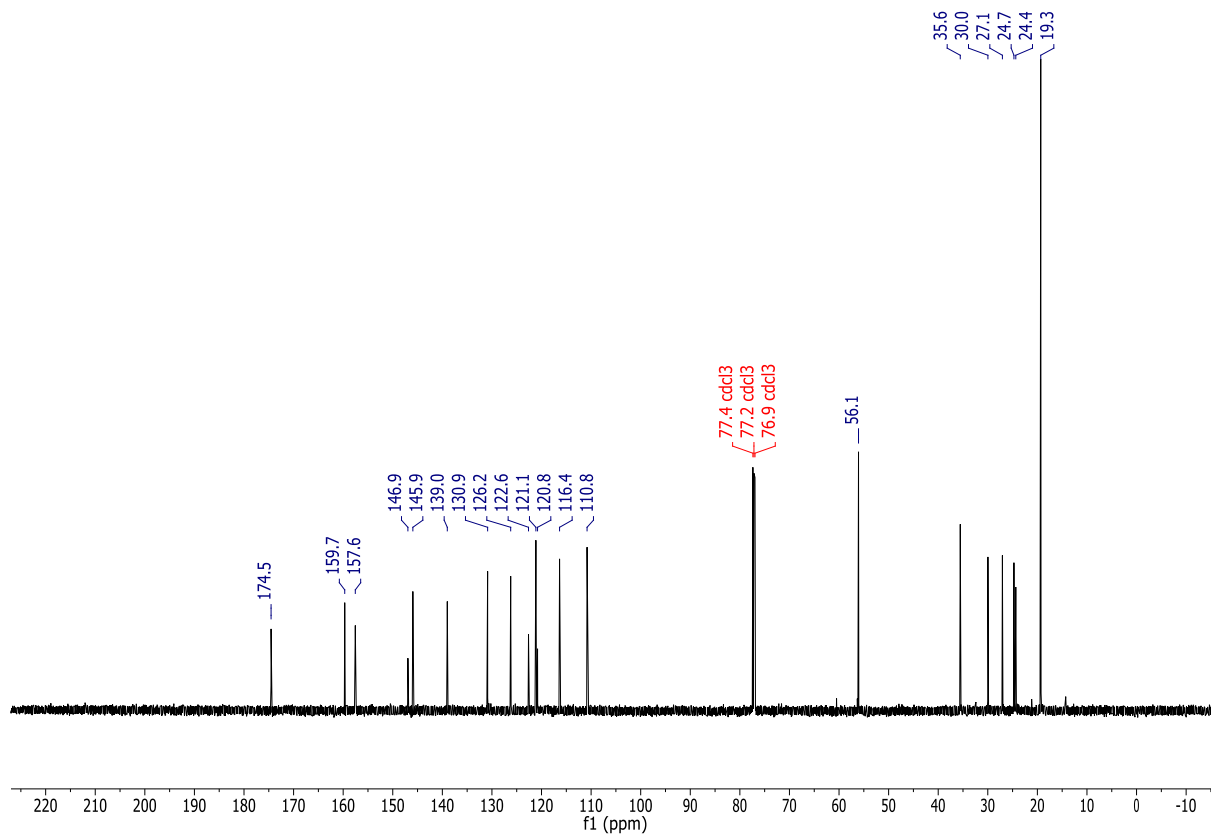

## Corrector Activity Figure For corr4a, 9a, 9e, 10a, and 10c

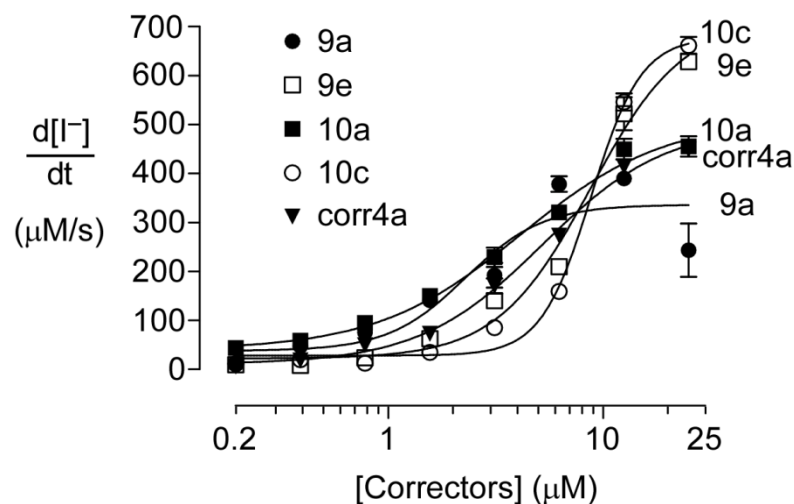

## HRMS Data Summary

| Number | Formula         | [M+H] calc. | [M+H] found | purity |
|--------|-----------------|-------------|-------------|--------|
| 7a     | C16H16ClN4OS2+  | 379.0449    | 379.0468    | ≥95%   |
| 8a     | C17H18ClN4OS2+  | 393.0605    | 393.0593    | ≥95%   |
| 9a     | C21H24ClN4O2S2+ | 463.1024    | 463.1021    | ≥95%   |
| 9b     | C20H20ClN4O2S2+ | 447.0711    | 447.0708    | ≥95%   |
| 9c     | C20H22ClN4O2S2+ | 449.0867    | 449.0870    | ≥95%   |
| 9d     | C21H24ClN4O2S2+ | 463.1024    | 463.1024    | ≥95%   |
| 9e     | C21H22ClN4O4S2+ | 493.0766    | 493.0758    | ≥95%   |
| 9f     | C20H17ClN5O3S2+ | 474.0456    | 474.0462    | ≥95%   |
| 9g     | C22H27ClN5OS2+  | 476.1340    | 476.1338    | ≥95%   |
| 9h     | C20H24N5OS2+    | 414.1417    | 414.1404    | ≥95%   |
| 9i     | C22H28N5OS2+    | 442.1730    | 442.1725    | ≥95%   |
| 9j     | C21H24N5O4S2+   | 474.1264    | 474.1253    | ≥95%   |
| 10a    | C22H26ClN4O2S2+ | 477.1180    | 477.1176    | ≥95%   |
| 10b    | C21H22ClN4O2S2+ | 461.0867    | 461.0865    | ≥95%   |
| 10c    | C21H24ClN4O2S2+ | 463.1024    | 463.1021    | ≥95%   |
| 10d    | C22H26ClN4O2S2+ | 477.1180    | 477.1176    | ≥95%   |
| 10e    | C22H24ClN4O4S2+ | 507.0922    | 507.0918    | ≥95%   |
| 10f    | C21H19ClN5O3S2+ | 488.0612    | 488.0609    | ≥95%   |
| 10g    | C23H29ClN5OS2+  | 490.1497    | 490.1491    | ≥95%   |
| 10h    | C21H26N5OS2+    | 428.1573    | 428.1570    | ≥95%   |
| 10i    | C23H30N5OS2+    | 456.1886    | 456.1884    | ≥95%   |
| 10j    | C22H26N5O4S2+   | 488.1421    | 488.1415    | ≥95%   |

## Computational Supporting Information

### Gaussian09 Full Reference:

Gaussian 09, Revision B.01, Frisch, M. J.; Trucks, G. W.; Schlegel, H. B.; Scuseria, G. E.; Robb, M. A.; Cheeseman, J. R.; Scalmani, G.; Barone, V.; Mennucci, B.; Petersson, G. A.; Nakatsuji, H.; Caricato, M.; Li, X.; Hratchian, H. P.; Izmaylov, A. F.; Bloino, J.; Zheng, G.; Sonnenberg, J. L.; Hada, M.; Ehara, M.; Toyota, K.; Fukuda, R.; Hasegawa, J.; Ishida, M.; Nakajima, T.; Honda, Y.; Kitao, O.; Nakai, H.; Vreven, T.; Montgomery, Jr., J. A.; Peralta, J. E.; Ogliaro, F.; Bearpark, M.; Heyd, J. J.; Brothers, E.; Kudin, K. N.; Staroverov, V. N.; Kobayashi, R.; Normand, J.; Raghavachari, K.; Rendell, A.; Burant, J. C.; Iyengar, S. S.; Tomasi, J.; Cossi, M.; Rega, N.; Millam, N. J.; Klene, M.; Knox, J. E.; Cross, J. B.; Bakken, V.; Adamo, C.; Jaramillo, J.; Gomperts, R.; Stratmann, R. E.; Yazyev, O.; Austin, A. J.; Cammi, R.; Pomelli, C.; Ochterski, J. W.; Martin, R. L.; Morokuma, K.; Zakrzewski, V. G.; Voth, G. A.; Salvador, P.; Dannenberg, J. J.; Dapprich, S.; Daniels, A. D.; Farkas, Ö.; Foresman, J. B.; Ortiz, J. V.; Cioslowski, J.; Fox, D. J. Gaussian, Inc., Wallingford CT, **2009**.

### Spartan10 Full Reference:

Shao, Y.; Molnar, L.F.; Jung, Y.; Kussmann, J.; Ochsenfeld, C.; Brown, S.T.; Gilbert, A.T.B.; Slipchenko, L.V.; Levchenko, S.V.; O'Neill, D.P.; DiStasio Jr., R.A.; Lochan, R.C.; Wang, T.; Beran, G.J.O.; Besley, N.A.; Herbert, J.M.; Lin, C.Y.; Van Voorhis, T.; Chien, S.H.; Sodt, S.H.; Steele, R.P.; Rassolov, V.A.; Maslen, P.E.; Korambath, P.P.; Adamson, R.D.; Austin, B.; Baker, J.; Byrd, E.F.C.; Dachsel, H.; Doerksen, R.J.; Dreuw, A.; Dunietz, B.D.; Dutoi, A.D.; Furlani, T.R.; Gwaltney, S.R.; Heyden, A.; Hirata, S.; Hsu, C-P.; Kedziora, G.; Khalliulin, R.Z.; Klunzinger, P.; Lee, A.M.; Lee, M.S.; Liang, W.Z.; Lotan, I.; Nair, N.; Peters, B.; Proynov, E.I.; Pieniazek, P.A.; Rhee, Y.M.; Ritchie, J.; Rosta, E.; Sherrill, C.D.; Simmonett, A.C.; Subotnik, J.E.; Woodcock III H.L.; Zhang, W.; Bell, A.T.; Chakraborty, A.K.; Chipman, D.M.; Keil, F.J.; Warshel, A.; Hehre, W.J.; Schaefer, H.F.; Kong, J.; A.I. Krylov, A.I.; Gill, P.M.W.; and Head-Gordon, M. *Phys. Chem. Chem. Phys.*, **2006**, 8, 3172.

### Spartan conformational searching:

The conformational searches of bithiazoles **3**, **1**, and **9** were done using Spartan10. Conformer distribution at the ground state using Molecular Mechanics (MMFF) and keywords “searchmethod=systematic” and “maxenergy=50” were used.

## Calculated coordinates and energies for **3**, **9a**, and **10a**:

**3**: lowest energy conformation

Charge = 0 Multiplicity = 1

mem = 10GB

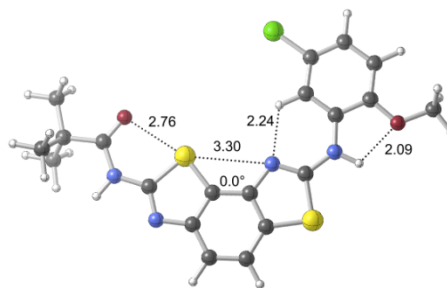

Link 0: opt freq=noraman m062x/6-31+g(d,p)

| Item                 | Value    | Threshold | Converged? |
|----------------------|----------|-----------|------------|
| Maximum Force        | 0.029384 | 0.000450  | NO         |
| RMS Force            | 0.004758 | 0.000300  | NO         |
| Maximum Displacement | 0.315191 | 0.001800  | NO         |
| RMS Displacement     | 0.048115 | 0.001200  | NO         |

Predicted change in Energy=-9.842131D-03

Imaginary Frequencies: none found

Coordinates (from last standard orientation):

```
-----  
Center  Atomic      Coordinates (Angstroms)  
Number  Number          X      Y      Z  
-----  
1       6       -2.069457 -2.083773 -0.218888  
2       6       -1.047407 -1.215082 -0.009210  
3       6       -3.290988 -0.283651 -0.012654  
4       6        0.333125 -1.649027  0.006990
```



|    |    |           |           |           |
|----|----|-----------|-----------|-----------|
| 5  | 6  | 0.576471  | -2.983068 | 0.041083  |
| 6  | 6  | 2.514830  | -1.469065 | 0.046796  |
| 7  | 6  | 4.193312  | 0.359994  | 0.002369  |
| 8  | 6  | 5.593977  | 0.574568  | 0.029875  |
| 9  | 6  | 3.340469  | 1.460326  | -0.066594 |
| 10 | 6  | 6.119998  | 1.852914  | -0.011571 |
| 11 | 6  | 3.904819  | 2.732170  | -0.105942 |
| 12 | 6  | 5.265213  | 2.959341  | -0.080713 |
| 13 | 6  | -5.707774 | 0.292752  | -0.060039 |
| 14 | 6  | -6.644878 | 1.503503  | 0.092754  |
| 15 | 6  | -8.083529 | 1.003829  | -0.060332 |
| 16 | 6  | -6.343782 | 2.542251  | -1.003148 |
| 17 | 6  | -6.465815 | 2.132057  | 1.486917  |
| 18 | 6  | 7.755093  | -0.392524 | 0.154419  |
| 19 | 17 | 2.813675  | 4.114217  | -0.189471 |
| 20 | 6  | -1.797280 | -3.533410 | -0.524001 |
| 21 | 6  | -0.503720 | -4.021939 | 0.165584  |
| 22 | 1  | 4.550005  | -1.636034 | 0.098692  |
| 23 | 1  | -4.111751 | 1.563094  | 0.239336  |
| 24 | 1  | 2.270247  | 1.315509  | -0.087317 |
| 25 | 1  | 7.192183  | 2.009641  | 0.008528  |
| 26 | 1  | 5.661970  | 3.966789  | -0.112785 |
| 27 | 1  | -8.228062 | 0.536047  | -1.036774 |
| 28 | 1  | -8.316419 | 0.256610  | 0.701789  |
| 29 | 1  | -8.775686 | 1.845276  | 0.039971  |

|    |    |           |           |           |
|----|----|-----------|-----------|-----------|
| 30 | 1  | -7.056199 | 3.368921  | -0.920277 |
| 31 | 1  | -5.337840 | 2.965571  | -0.919369 |
| 32 | 1  | -6.446005 | 2.097744  | -1.997340 |
| 33 | 1  | -6.635559 | 1.389858  | 2.272337  |
| 34 | 1  | -5.469483 | 2.561646  | 1.631997  |
| 35 | 1  | -7.192919 | 2.940111  | 1.613328  |
| 36 | 1  | 8.170662  | -1.396036 | 0.223723  |
| 37 | 1  | 8.108940  | 0.102939  | -0.755020 |
| 38 | 1  | 8.029651  | 0.193390  | 1.036891  |
| 39 | 1  | -1.695551 | -3.643632 | -1.611905 |
| 40 | 1  | -2.647728 | -4.139994 | -0.205011 |
| 41 | 1  | -0.194421 | -4.973624 | -0.273732 |
| 42 | 1  | -0.701995 | -4.197832 | 1.232204  |
| 43 | 8  | -6.099325 | -0.830725 | -0.271343 |
| 44 | 8  | 6.345701  | -0.568947 | 0.100996  |
| 45 | 7  | -3.341950 | -1.549311 | -0.223613 |
| 46 | 7  | 1.418763  | -0.790414 | 0.005318  |
| 47 | 7  | 3.783558  | -0.978625 | 0.050332  |
| 48 | 7  | -4.349925 | 0.598631  | 0.066393  |
| 49 | 16 | -1.646027 | 0.407442  | 0.215271  |
| 50 | 16 | 2.308109  | -3.252770 | 0.089311  |

**3:** second lowest energy conformation

Charge = 0 Multiplicity = 1

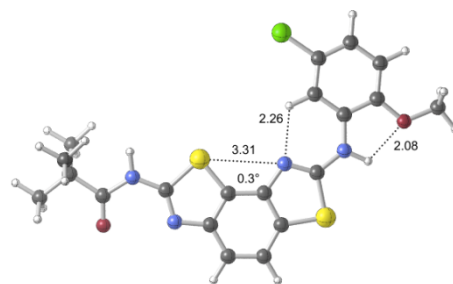

mem = 10GB

HF = -2400.3285782 hartrees (-1506230.18610628 kcal/mol)

Imaginary Frequencies: none found

Zero-point correction = 0.391473 (Hartree/Particle)

Temperature 298.150 Kelvin. Pressure 1.00000 Atm.

Sum of electronic and thermal Free Energies =

-2399.998467 hartrees (-1506023.03802717 kcal/mol)

Coordinates (from last standard orientation):

-----

| Center | Atomic | Coordinates (Angstroms) |           |           |
|--------|--------|-------------------------|-----------|-----------|
| Number | Number | X                       | Y         | Z         |
| 1      | 6      | -2.012863               | 2.563156  | 0.261186  |
| 2      | 6      | -1.093506               | 1.573953  | 0.050959  |
| 3      | 6      | -3.386980               | 0.867119  | 0.101109  |
| 4      | 6      | 0.326495                | 1.870923  | 0.007793  |
| 5      | 6      | 0.709698                | 3.177964  | -0.052424 |
| 6      | 6      | 2.483237                | 1.490235  | -0.068174 |
| 7      | 6      | 3.964185                | -0.505150 | -0.012212 |
| 8      | 6      | 5.332510                | -0.863986 | -0.037024 |
| 9      | 6      | 2.996085                | -1.503148 | 0.069309  |
| 10     | 6      | 5.710289                | -2.195398 | 0.021290  |

-----

|    |    |           |           |           |
|----|----|-----------|-----------|-----------|
| 11 | 6  | 3.404014  | -2.836453 | 0.125921  |
| 12 | 6  | 4.738488  | -3.199061 | 0.103443  |
| 13 | 6  | -4.821188 | -1.116683 | -0.112744 |
| 14 | 6  | -6.282945 | -1.576474 | -0.086518 |
| 15 | 6  | -6.308838 | -3.089469 | -0.308125 |
| 16 | 6  | -7.060873 | -0.873261 | -1.211487 |
| 17 | 6  | -6.906876 | -1.241262 | 1.278304  |
| 18 | 6  | 7.581286  | -0.091116 | -0.157952 |
| 19 | 17 | 2.179132  | -4.076681 | 0.221480  |
| 20 | 6  | -1.584473 | 3.980426  | 0.529137  |
| 21 | 6  | -0.263508 | 4.316549  | -0.190084 |
| 22 | 1  | 4.523611  | 1.443813  | -0.144156 |
| 23 | 1  | -5.400160 | 0.852791  | 0.241549  |
| 24 | 1  | 1.947523  | -1.242261 | 0.086897  |
| 25 | 1  | 6.757201  | -2.473322 | 0.003191  |
| 26 | 1  | 5.026417  | -4.242812 | 0.147470  |
| 27 | 1  | -5.856823 | -3.352436 | -1.267500 |
| 28 | 1  | -5.749705 | -3.609038 | 0.473747  |
| 29 | 1  | -7.345137 | -3.440918 | -0.296165 |
| 30 | 1  | -8.086678 | -1.254647 | -1.236112 |
| 31 | 1  | -7.115348 | 0.210856  | -1.068284 |
| 32 | 1  | -6.601421 | -1.065566 | -2.185829 |
| 33 | 1  | -6.336029 | -1.695944 | 2.093666  |
| 34 | 1  | -6.962935 | -0.163169 | 1.461093  |
| 35 | 1  | -7.927871 | -1.634372 | 1.316118  |

|    |    |           |           |           |
|----|----|-----------|-----------|-----------|
| 36 | 1  | 8.085151  | 0.872102  | -0.227807 |
| 37 | 1  | 7.898386  | -0.606859 | 0.755468  |
| 38 | 1  | 7.831656  | -0.701243 | -1.033022 |
| 39 | 1  | -1.451713 | 4.103583  | 1.613212  |
| 40 | 1  | -2.371729 | 4.671674  | 0.217586  |
| 41 | 1  | 0.148303  | 5.245910  | 0.212780  |
| 42 | 1  | -0.458496 | 4.486566  | -1.258985 |
| 43 | 8  | -3.879718 | -1.867120 | -0.297741 |
| 44 | 8  | 6.196076  | 0.192408  | -0.121089 |
| 45 | 7  | -3.321439 | 2.154948  | 0.293754  |
| 46 | 7  | 1.321991  | 0.915177  | 0.005714  |
| 47 | 7  | 3.698570  | 0.863683  | -0.078079 |
| 48 | 7  | -4.618201 | 0.230372  | 0.085710  |
| 49 | 16 | -1.871774 | 0.036983  | -0.131396 |
| 50 | 16 | 2.444139  | 3.253900  | -0.139816 |

**9a:** lowest energy conformation

Charge = 0 Multiplicity = 1

mem = 10GB

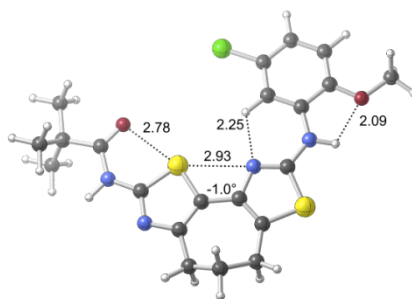

HF = -2439.6284424 hartrees (-1530891.24389042 kcal/mol)

Imaginary Frequencies: none found

Zero-point correction = 0.420038 (Hartree/Particle)

Temperature 298.150 Kelvin. Pressure 1.00000 Atm.

Sum of electronic and thermal Free Energies =

-2439.272639 hartrees (-1530667.97369889 kcal/mol)

Coordinates (from last standard orientation):

-----

Center Atomic Coordinates (Angstroms)

Number Number X Y Z

-----

|    |   |           |           |           |
|----|---|-----------|-----------|-----------|
| 1  | 6 | -2.045761 | 2.745385  | 0.094328  |
| 2  | 6 | -0.976214 | 1.892657  | 0.025215  |
| 3  | 6 | -3.145668 | 0.836675  | 0.051985  |
| 4  | 6 | 0.458597  | 2.155980  | 0.023921  |
| 5  | 6 | 1.078251  | 3.372586  | 0.055845  |
| 6  | 6 | 2.537864  | 1.395156  | 0.027597  |
| 7  | 6 | 3.624066  | -0.840308 | 0.003681  |
| 8  | 6 | 4.902993  | -1.444622 | 0.005255  |
| 9  | 6 | 2.487044  | -1.644632 | -0.014433 |
| 10 | 6 | 5.028203  | -2.824016 | -0.010523 |
| 11 | 6 | 2.640714  | -3.031823 | -0.030080 |
| 12 | 6 | 3.886385  | -3.633083 | -0.028484 |
| 13 | 6 | -4.269415 | -1.347785 | -0.002232 |
| 14 | 6 | -5.650852 | -2.012124 | 0.008150  |
| 15 | 6 | -6.410347 | -1.611290 | 1.283572  |
| 16 | 6 | -5.449585 | -3.527783 | -0.017579 |

|    |    |           |           |           |
|----|----|-----------|-----------|-----------|
| 17 | 6  | -6.437182 | -1.571444 | -1.237994 |
| 18 | 6  | 7.257890  | -1.098874 | 0.025573  |
| 19 | 17 | 1.207479  | -4.024362 | -0.053444 |
| 20 | 6  | -2.012142 | 4.245518  | 0.160945  |
| 21 | 6  | 0.516880  | 4.764456  | 0.084201  |
| 22 | 6  | -0.852812 | 4.906528  | -0.587940 |
| 23 | 1  | 4.536882  | 0.975113  | 0.036070  |
| 24 | 1  | -5.141628 | 0.541911  | 0.102623  |
| 25 | 1  | 1.503509  | -1.196554 | -0.016490 |
| 26 | 1  | 6.006402  | -3.289414 | -0.009128 |
| 27 | 1  | 3.976055  | -4.712884 | -0.041196 |
| 28 | 1  | -5.839853 | -1.874771 | 2.179345  |
| 29 | 1  | -6.630291 | -0.539407 | 1.322414  |
| 30 | 1  | -7.366155 | -2.143714 | 1.318359  |
| 31 | 1  | -6.425119 | -4.024094 | -0.016014 |
| 32 | 1  | -4.897405 | -3.834519 | -0.908991 |
| 33 | 1  | -4.881483 | -3.862170 | 0.854024  |
| 34 | 1  | -6.641928 | -0.495894 | -1.244690 |
| 35 | 1  | -5.891255 | -1.820087 | -2.153133 |
| 36 | 1  | -7.400158 | -2.091621 | -1.262263 |
| 37 | 1  | 7.933932  | -0.244977 | 0.040835  |
| 38 | 1  | 7.425642  | -1.716838 | 0.914991  |
| 39 | 1  | 7.437559  | -1.694029 | -0.876949 |
| 40 | 1  | -1.999520 | 4.561951  | 1.213003  |
| 41 | 1  | -2.961908 | 4.598272  | -0.252361 |

|    |    |           |           |           |
|----|----|-----------|-----------|-----------|
| 42 | 1  | 0.452315  | 5.118565  | 1.122238  |
| 43 | 1  | 1.221698  | 5.434079  | -0.422119 |
| 44 | 1  | -1.068819 | 5.976827  | -0.670815 |
| 45 | 1  | -0.799905 | 4.509963  | -1.608489 |
| 46 | 8  | -3.222383 | -1.966885 | -0.058369 |
| 47 | 8  | 5.948833  | -0.563751 | 0.023599  |
| 48 | 7  | -3.278015 | 2.130584  | 0.106301  |
| 49 | 7  | 1.292402  | 1.044351  | 0.003968  |
| 50 | 7  | 3.617447  | 0.555811  | 0.021724  |
| 51 | 7  | -4.271861 | 0.027969  | 0.052248  |
| 52 | 16 | -1.522666 | 0.234548  | -0.023618 |
| 53 | 16 | 2.808879  | 3.128552  | 0.070477  |

**9a**: second lowest energy conformation

Charge = 0 Multiplicity = 1

mem = 6400MB

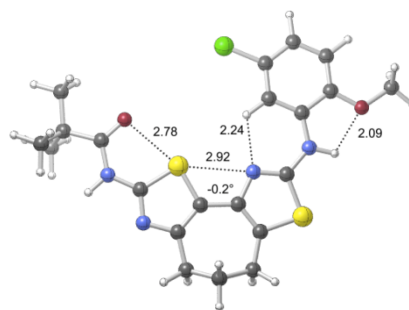

HF = -2439.6159893 hartrees (-1530883.42944564 kcal/mol)

Imaginary Frequencies: none found

Zero-point correction = 0.419806 (Hartree/Particle)

Temperature 298.150 Kelvin. Pressure 1.00000 Atm.

Sum of electronic and thermal Free Energies =

-2439.261591 hartrees (-1530661.04096841 kcal/mol)



Coordinates (from last standard orientation):

-----

| Center | Atomic | Coordinates (Angstroms) |           |           |
|--------|--------|-------------------------|-----------|-----------|
| Number | Number | X                       | Y         | Z         |
| 1      | 6      | 2.097099                | 2.280332  | -0.273660 |
| 2      | 6      | 0.944365                | 1.547906  | -0.140643 |
| 3      | 6      | 3.002154                | 0.274791  | -0.329923 |
| 4      | 6      | -0.453215               | 1.960878  | -0.069059 |
| 5      | 6      | -0.937610               | 3.237336  | -0.045747 |
| 6      | 6      | -2.599634               | 1.426425  | 0.007458  |
| 7      | 6      | -3.918555               | -0.680013 | 0.030993  |
| 8      | 6      | -5.255596               | -1.142450 | 0.059320  |
| 9      | 6      | -2.876314               | -1.603489 | -0.004269 |
| 10     | 6      | -5.530077               | -2.500274 | 0.051837  |
| 11     | 6      | -3.181798               | -2.965322 | -0.011131 |
| 12     | 6      | -4.484109               | -3.428987 | 0.016193  |
| 13     | 6      | 5.126528                | -0.739103 | 0.370309  |
| 14     | 6      | 6.105090                | -1.877135 | 0.038084  |
| 15     | 6      | 5.396455                | -3.240221 | 0.091883  |
| 16     | 6      | 7.233078                | -1.847688 | 1.070357  |
| 17     | 6      | 6.681306                | -1.635294 | -1.367192 |
| 18     | 6      | -7.558418               | -0.543681 | 0.126946  |
| 19     | 17     | -1.864628               | -4.113350 | -0.054065 |

|    |   |           |           |           |
|----|---|-----------|-----------|-----------|
| 20 | 6 | 2.213852  | 3.777387  | -0.319538 |
| 21 | 6 | -0.233526 | 4.563045  | -0.063480 |
| 22 | 6 | 1.183087  | 4.535740  | 0.519325  |
| 23 | 1 | -4.630435 | 1.221984  | 0.075091  |
| 24 | 1 | 3.787045  | -1.510196 | -1.012804 |
| 25 | 1 | -1.850363 | -1.264589 | -0.025215 |
| 26 | 1 | -6.552812 | -2.856610 | 0.073153  |
| 27 | 1 | -4.690821 | -4.492589 | 0.010529  |
| 28 | 1 | 4.901409  | -3.391754 | 1.056021  |
| 29 | 1 | 4.650699  | -3.366214 | -0.700701 |
| 30 | 1 | 6.135962  | -4.036432 | -0.039701 |
| 31 | 1 | 7.959878  | -2.633327 | 0.840644  |
| 32 | 1 | 7.740462  | -0.880538 | 1.064671  |
| 33 | 1 | 6.845128  | -2.010611 | 2.079392  |
| 34 | 1 | 5.908494  | -1.674575 | -2.141442 |
| 35 | 1 | 7.169358  | -0.657660 | -1.424787 |
| 36 | 1 | 7.425922  | -2.405589 | -1.594044 |
| 37 | 1 | -8.136887 | 0.378777  | 0.152244  |
| 38 | 1 | -7.822497 | -1.118559 | -0.767662 |
| 39 | 1 | -7.771384 | -1.136120 | 1.023812  |
| 40 | 1 | 2.164347  | 4.116212  | -1.363484 |
| 41 | 1 | 3.221163  | 4.017198  | 0.033113  |
| 42 | 1 | -0.198767 | 4.949897  | -1.090993 |
| 43 | 1 | -0.830653 | 5.279925  | 0.511798  |
| 44 | 1 | 1.518697  | 5.573698  | 0.612390  |

|    |    |           |           |           |
|----|----|-----------|-----------|-----------|
| 45 | 1  | 1.153198  | 4.117137  | 1.531895  |
| 46 | 8  | 5.336903  | 0.093002  | 1.223888  |
| 47 | 8  | -6.199045 | -0.154166 | 0.091994  |
| 48 | 7  | 3.253058  | 1.542877  | -0.392541 |
| 49 | 7  | -1.399470 | 0.943643  | -0.034068 |
| 50 | 7  | -3.761704 | 0.706617  | 0.042255  |
| 51 | 7  | 3.973538  | -0.725142 | -0.406610 |
| 52 | 16 | 1.327926  | -0.146939 | -0.112891 |
| 53 | 16 | -2.683192 | 3.179424  | 0.017673  |

**10a:** lowest energy conformation

Charge = 0 Multiplicity = 1

mem = 10GB

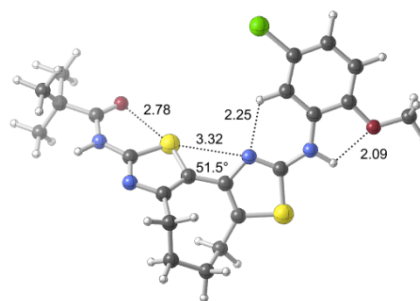

HF = -2478.9219167 hartrees (-1555548.29194842 kcal/mol)

Imaginary Frequencies: none found

Zero-point correction = 0.449556 (Hartree/Particle)

Temperature 298.150 Kelvin. Pressure 1.00000 Atm.

Sum of electronic and thermal Free Energies =

-2478.536709 hartrees (-1555306.57026459 kcal/mol)

Coordinates (from last standard orientation):

-----

| Center | Atomic | Coordinates (Angstroms) |           |           |
|--------|--------|-------------------------|-----------|-----------|
| Number | Number | X                       | Y         | Z         |
| -----  |        |                         |           |           |
| 1      | 6      | 1.885460                | 1.932353  | 0.994103  |
| 2      | 6      | 1.036596                | 1.270592  | 0.149466  |
| 3      | 6      | 3.257426                | 0.349097  | 0.312015  |
| 4      | 6      | -0.337957               | 1.637725  | -0.167491 |
| 5      | 6      | -0.696546               | 2.902332  | -0.535268 |
| 6      | 6      | -2.495522               | 1.236672  | -0.372359 |
| 7      | 6      | -3.998423               | -0.721028 | -0.072656 |
| 8      | 6      | -5.358960               | -1.093403 | -0.181757 |
| 9      | 6      | -3.058474               | -1.670177 | 0.322316  |
| 10     | 6      | -5.757851               | -2.389538 | 0.101050  |
| 11     | 6      | -3.488291               | -2.967618 | 0.603951  |
| 12     | 6      | -4.815051               | -3.343536 | 0.499425  |
| 13     | 6      | 4.694021                | -1.467341 | -0.513867 |
| 14     | 6      | 6.102431                | -2.059431 | -0.392596 |
| 15     | 6      | 6.169989                | -3.310384 | -1.269866 |
| 16     | 6      | 6.384659                | -2.436584 | 1.071133  |
| 17     | 6      | 7.131108                | -1.025622 | -0.880904 |
| 18     | 6      | -7.570115               | -0.387455 | -0.712576 |
| 19     | 17     | -2.300439               | -4.148938 | 1.098721  |
| 20     | 6      | 1.540158                | 3.106525  | 1.866907  |
| 21     | 6      | 0.171138                | 4.090242  | -0.831675 |
| 22     | 6      | 1.717775                | 4.488734  | 1.210403  |

|    |   |           |           |           |
|----|---|-----------|-----------|-----------|
| 23 | 6 | 0.530524  | 4.975698  | 0.378064  |
| 24 | 1 | -4.516847 | 1.155660  | -0.653458 |
| 25 | 1 | 5.171665  | 0.025479  | 0.859120  |
| 26 | 1 | -2.015003 | -1.400095 | 0.404430  |
| 27 | 1 | -6.798822 | -2.677550 | 0.017837  |
| 28 | 1 | -5.118314 | -4.359585 | 0.722680  |
| 29 | 1 | 5.436228  | -4.053713 | -0.948187 |
| 30 | 1 | 5.959311  | -3.068779 | -2.314270 |
| 31 | 1 | 7.170422  | -3.748749 | -1.201419 |
| 32 | 1 | 7.361071  | -2.927170 | 1.136601  |
| 33 | 1 | 6.411673  | -1.564305 | 1.732424  |
| 34 | 1 | 5.628456  | -3.129579 | 1.452110  |
| 35 | 1 | 6.921655  | -0.721564 | -1.911030 |
| 36 | 1 | 7.148087  | -0.126518 | -0.256388 |
| 37 | 1 | 8.132051  | -1.468076 | -0.851622 |
| 38 | 1 | -8.051846 | 0.536182  | -1.031113 |
| 39 | 1 | -7.726062 | -1.163579 | -1.470164 |
| 40 | 1 | -7.995382 | -0.713254 | 0.243348  |
| 41 | 1 | 2.193156  | 3.041559  | 2.741894  |
| 42 | 1 | 0.506432  | 3.003473  | 2.218272  |
| 43 | 1 | 1.095273  | 3.720907  | -1.294651 |
| 44 | 1 | -0.332135 | 4.704105  | -1.586198 |
| 45 | 1 | 2.623989  | 4.476673  | 0.591186  |
| 46 | 1 | 1.892719  | 5.225044  | 2.002751  |
| 47 | 1 | 0.767241  | 5.979263  | 0.006514  |

|    |    |           |           |           |
|----|----|-----------|-----------|-----------|
| 48 | 1  | -0.353140 | 5.079107  | 1.021372  |
| 49 | 8  | 3.828597  | -1.923918 | -1.238879 |
| 50 | 8  | -6.195038 | -0.086022 | -0.576079 |
| 51 | 7  | 3.155712  | 1.400544  | 1.071109  |
| 52 | 7  | -1.352589 | 0.694578  | -0.092514 |
| 53 | 7  | -3.711298 | 0.609080  | -0.381818 |
| 54 | 7  | 4.451093  | -0.354086 | 0.259153  |
| 55 | 16 | 1.832854  | -0.100854 | -0.572727 |
| 56 | 16 | -2.428970 | 2.952642  | -0.755339 |

**10a:** second lowest energy conformation

Charge = 0 Multiplicity = 1

mem = 55GB

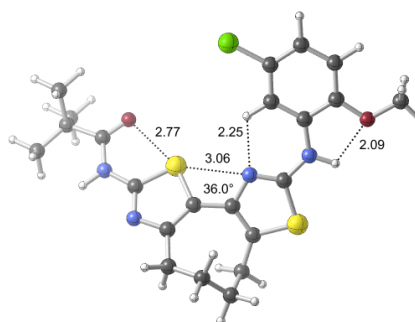

HF = -2478.9223142 hartrees (-1555548.54138364 kcal/mol)

Imaginary Frequencies: 1 (-6.7633 1/cm)

Zero-point correction = 0.449389 (Hartree/Particle)

Temperature 298.150 Kelvin. Pressure 1.00000 Atm.

Sum of electronic and thermal Free Energies =

-2478.534383 hartrees (-1555305.11067633 kcal/mol)

Coordinates (from last standard orientation):

-----

| Center | Atomic | Coordinates (Angstroms) |
|--------|--------|-------------------------|
|--------|--------|-------------------------|

| Number | Number | X         | Y         | Z         |
|--------|--------|-----------|-----------|-----------|
| 1      | 6      | 1.996593  | 2.403433  | 0.649472  |
| 2      | 6      | 1.014316  | 1.626061  | 0.088651  |
| 3      | 6      | 3.207626  | 0.616709  | 0.166556  |
| 4      | 6      | -0.398878 | 1.879791  | -0.192690 |
| 5      | 6      | -0.918508 | 3.070326  | -0.605236 |
| 6      | 6      | -2.492464 | 1.202616  | -0.383052 |
| 7      | 6      | -3.721236 | -0.932589 | -0.056188 |
| 8      | 6      | -5.025632 | -1.476668 | -0.124575 |
| 9      | 6      | -2.657185 | -1.750913 | 0.316526  |
| 10     | 6      | -5.247906 | -2.809977 | 0.178028  |
| 11     | 6      | -2.909303 | -3.090625 | 0.615873  |
| 12     | 6      | -4.180242 | -3.632636 | 0.554290  |
| 13     | 6      | 4.455391  | -1.414388 | -0.407392 |
| 14     | 6      | 5.822646  | -2.105671 | -0.361835 |
| 15     | 6      | 5.627551  | -3.417642 | 0.413727  |
| 16     | 6      | 6.923387  | -1.270760 | 0.298803  |
| 17     | 6      | 6.207276  | -2.416894 | -1.816721 |
| 18     | 6      | -7.321334 | -1.063343 | -0.602536 |
| 19     | 17     | -1.567101 | -4.105433 | 1.079376  |
| 20     | 6      | 1.934038  | 3.767464  | 1.298096  |
| 21     | 6      | -0.200111 | 4.367127  | -0.798517 |
| 22     | 6      | 0.559013  | 4.352750  | 1.642269  |
| 23     | 6      | -0.080584 | 5.161113  | 0.510313  |

|    |   |           |           |           |
|----|---|-----------|-----------|-----------|
| 24 | 1 | -4.489934 | 0.856847  | -0.637455 |
| 25 | 1 | 5.170201  | 0.302739  | 0.528793  |
| 26 | 1 | -1.655074 | -1.349376 | 0.372101  |
| 27 | 1 | -6.245657 | -3.228504 | 0.125810  |
| 28 | 1 | -4.346178 | -4.676856 | 0.791596  |
| 29 | 1 | 5.357505  | -3.222815 | 1.456983  |
| 30 | 1 | 4.833972  | -4.013073 | -0.043041 |
| 31 | 1 | 6.557737  | -3.994725 | 0.401969  |
| 32 | 1 | 7.857670  | -1.839854 | 0.289657  |
| 33 | 1 | 7.111391  | -0.335118 | -0.240352 |
| 34 | 1 | 6.695079  | -1.043815 | 1.346462  |
| 35 | 1 | 5.422063  | -3.003565 | -2.298801 |
| 36 | 1 | 6.354757  | -1.496592 | -2.391920 |
| 37 | 1 | 7.141491  | -2.987328 | -1.836802 |
| 38 | 1 | -7.394118 | -1.860669 | -1.350842 |
| 39 | 1 | -7.678910 | -1.431764 | 0.365526  |
| 40 | 1 | -7.924873 | -0.212109 | -0.914871 |
| 41 | 1 | 2.496170  | 4.473445  | 0.669467  |
| 42 | 1 | 2.523141  | 3.669184  | 2.215912  |
| 43 | 1 | 0.801547  | 4.133256  | -1.181259 |
| 44 | 1 | -0.697887 | 4.971833  | -1.563609 |
| 45 | 1 | 0.675630  | 5.015478  | 2.506221  |
| 46 | 1 | -0.115573 | 3.550202  | 1.960987  |
| 47 | 1 | 0.516225  | 6.062203  | 0.320759  |
| 48 | 1 | -1.076379 | 5.497902  | 0.822997  |



|    |    |           |           |           |
|----|----|-----------|-----------|-----------|
| 49 | 8  | 3.481480  | -1.959379 | -0.898851 |
| 50 | 8  | -5.993373 | -0.587355 | -0.501792 |
| 51 | 7  | 3.244192  | 1.810500  | 0.677811  |
| 52 | 7  | -1.290444 | 0.820245  | -0.088987 |
| 53 | 7  | -3.614975 | 0.420832  | -0.381199 |
| 54 | 7  | 4.362428  | -0.152794 | 0.126952  |
| 55 | 16 | 1.664434  | 0.077037  | -0.400314 |
| 56 | 16 | -2.641264 | 2.900847  | -0.818795 |
